# Supplementary material for: Massive image-based single-cell profiling reveals high levels of circulating platelet aggregates in patients with COVID-19
Source: PubMed Central journal article supplement (PMC8660840; doi:10.1038/s41467-021-27378-2), 2021-12-09
Supplement: 41467_2021_27378_MOESM1_ESM.pdf [file 41467_2021_27378_MOESM1_ESM.pdf]

## Supplementary Information

for

# Massive image-based single-cell profiling reveals high levels of circulating platelet aggregates in patients with COVID-19

by Nishikawa et al.

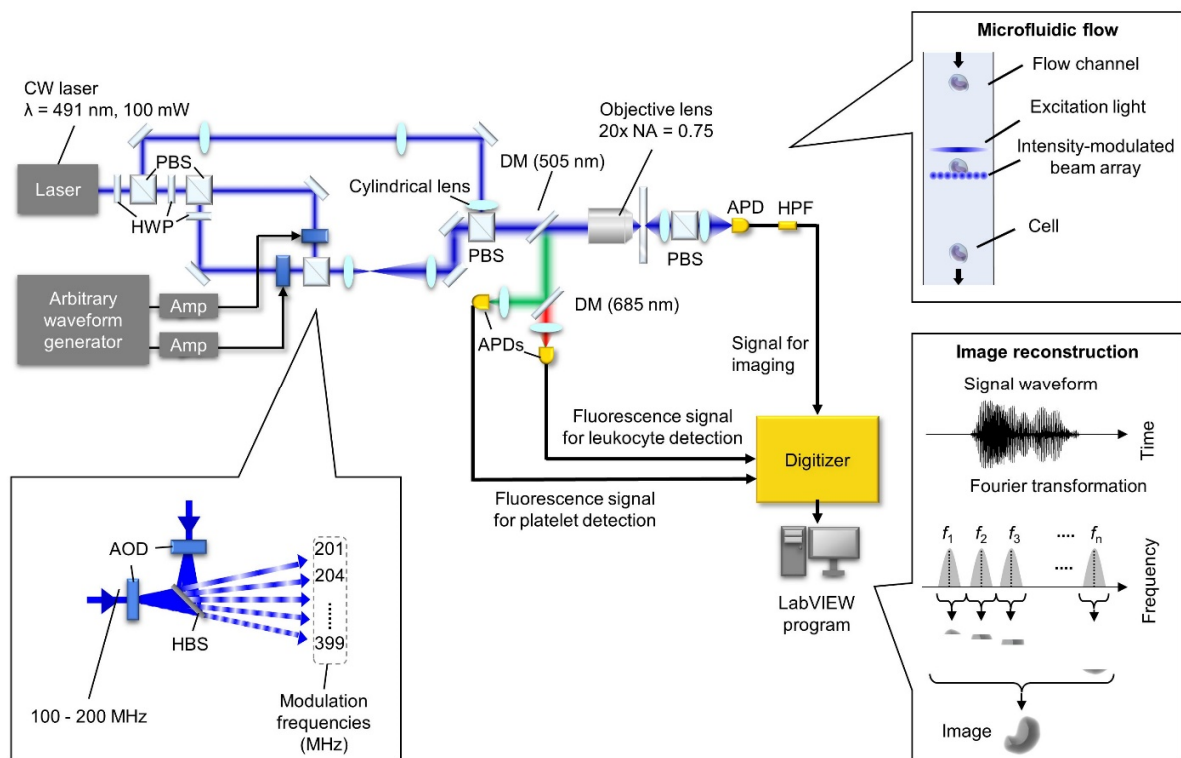

**Supplementary Fig. 1 | Detailed schematic of the FDM microscope.** CW: continuous wave; PBS: polarizing beamsplitter; HWP: half-wave plate; APD: avalanche photodetector; HPF: high-pass filter; DM: dichroic mirror; HBS: half beamsplitter; AOD: acousto-optic deflector; NA: numerical aperture. See “Optical frequency-division-multiplexed microscope” in the Methods section for details.

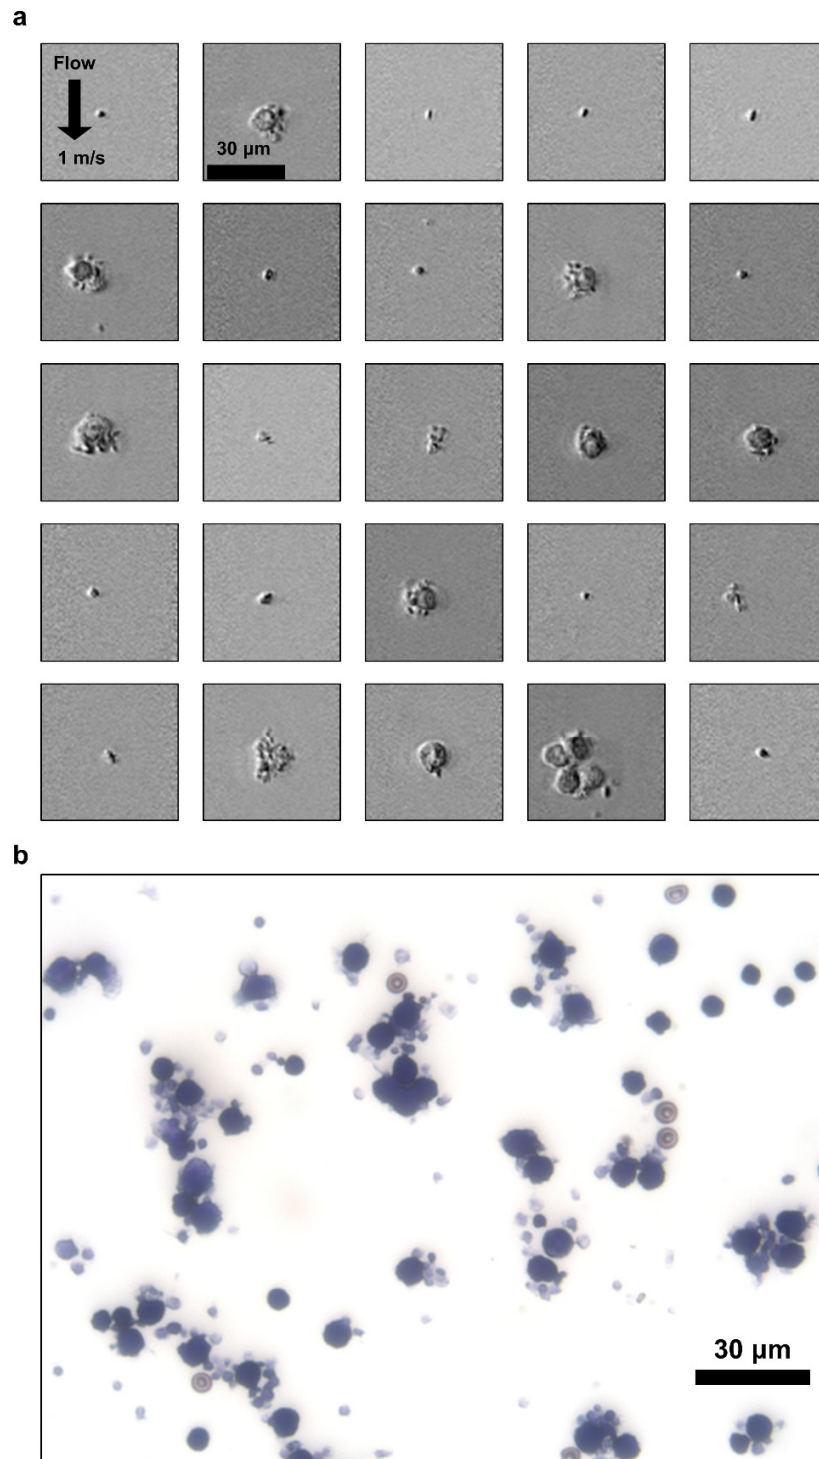

**Supplementary Fig. 2 | Images of single platelets and platelet aggregates. a,** Images of flowing single platelets and platelet aggregates obtained by the FDM microscope. **b,** Image of stationary single platelets, platelet aggregates, and leukocytes obtained by a conventional optical microscope. The sample was prepared using cytopspin, followed by May-Giemsa staining. Both samples were obtained from a blood sample collected from a single COVID-19 patient on the same blood draw date.

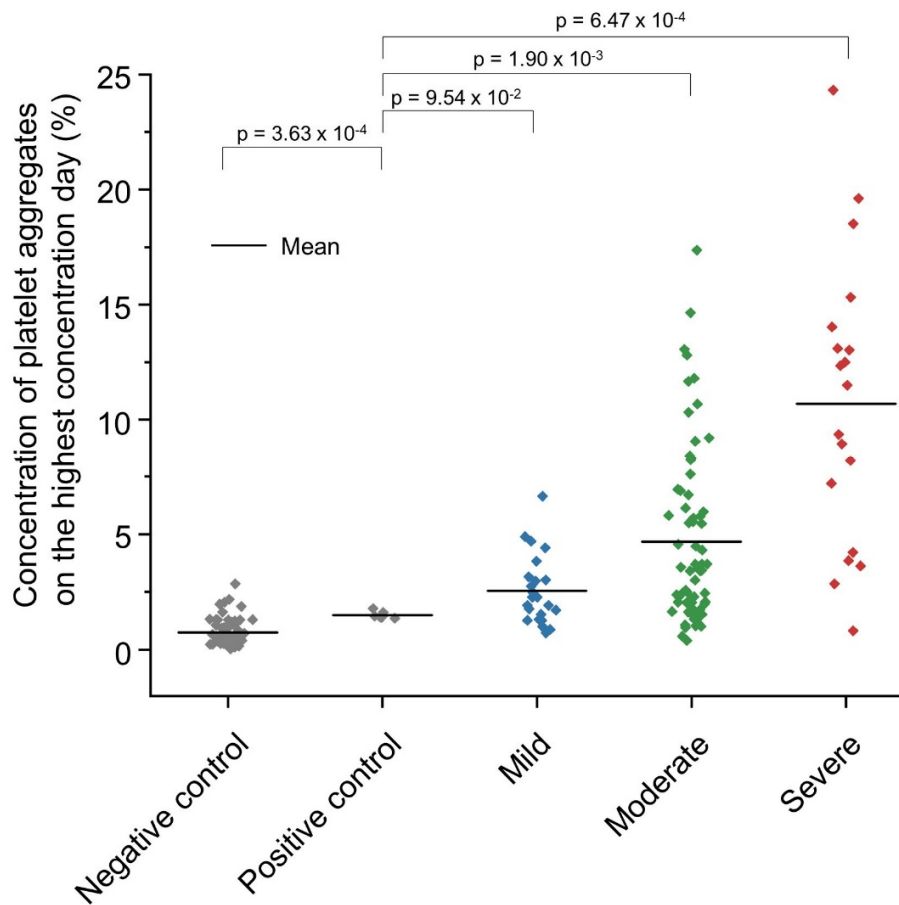

**Supplementary Fig. 3 | Comparison with negative and positive control groups.** Negative control: healthy subjects (n = 67 biologically independent samples); positive control (n = 7 biologically independent samples); patients under no anticoagulant therapy with no abnormality confirmed by their coagulation tests (see “human subjects” in the Methods section for details); Mild: mild COVID-19 patients (n = 23 biologically independent samples); Moderate: moderate COVID-19 patients (n = 68 biologically independent samples); Severe: severe COVID-19 patients (n = 19 biologically independent samples). Samples were measured on the highest concentration day of each hospitalized patient. Exact p values were obtained using the Mann–Whitney U-test (two-sided) and shown in the figure. Source data are provided as a Source Data file.

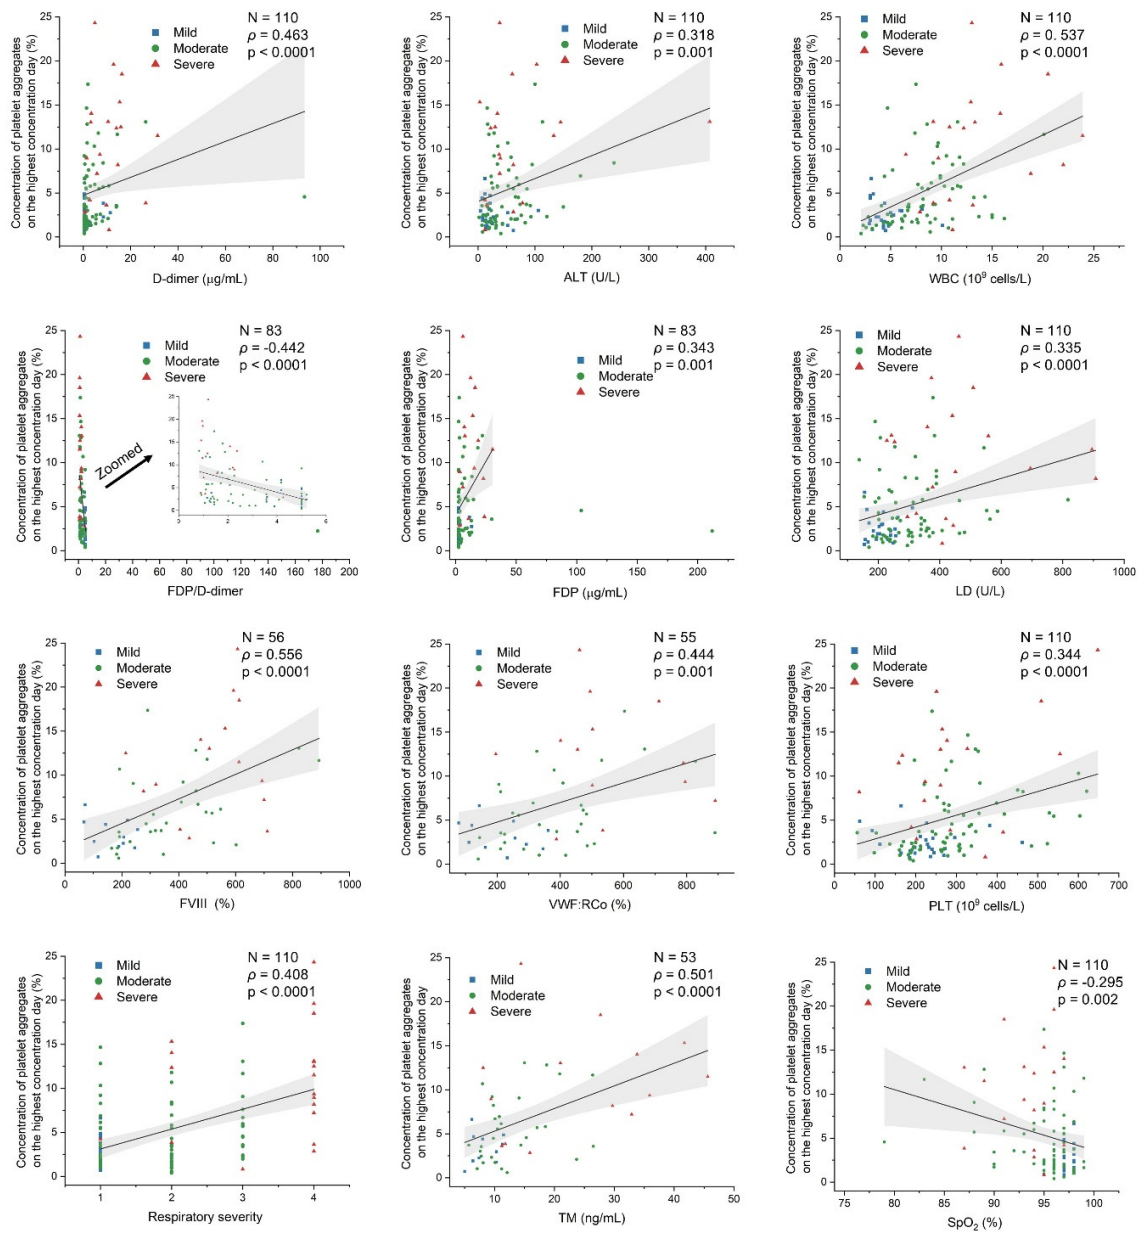

**Supplementary Fig. 4 | Strong correlations between the concentration of platelet aggregates and clinical laboratory and physical findings.** Respiratory severity level 1: without oxygen administration; level 2: with oxygen administration of 0.5 – 4 L/min; level 3: with oxygen administration of  $\geq 5$  L/min; level 4: with tracheal intubation or VV-ECMO. Linear fits show the correlation between the concentration of platelet aggregates and each clinical parameter with a 95% confidence interval shown in gray calculated by the standard error of measured y values. P values were obtained using the two-sided ANOVA test and shown in the figure. Source data are provided as a Source Data file.

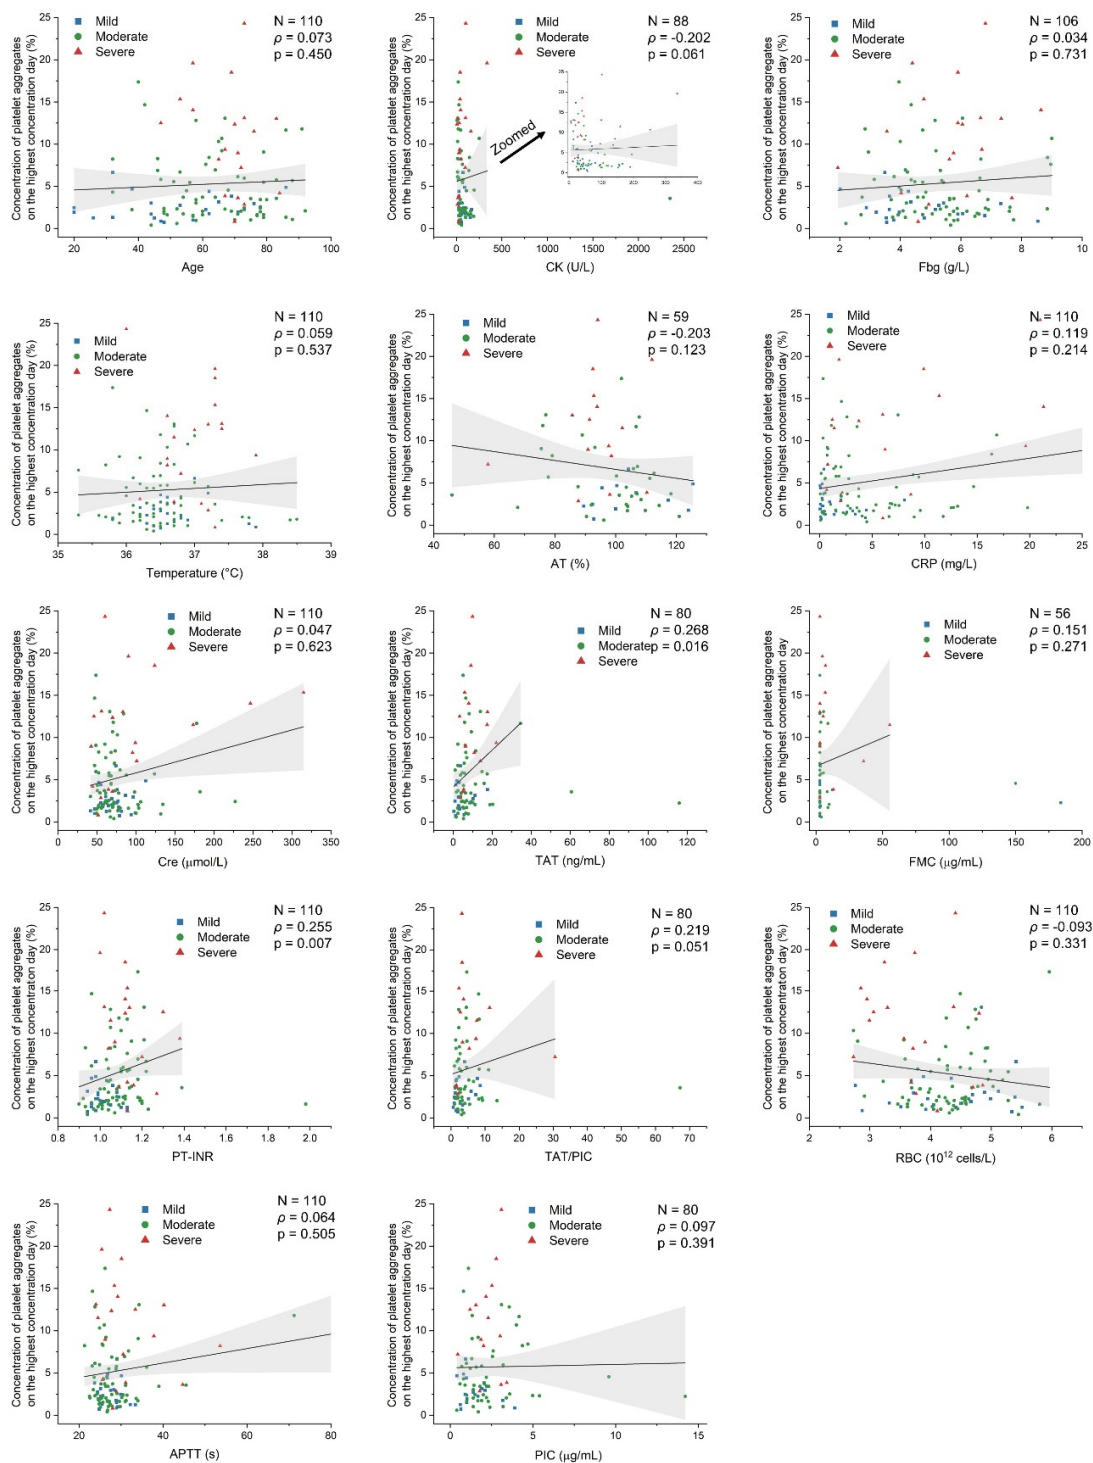

**Supplementary Fig. 5 | Weak correlations between the concentration of platelet aggregates and clinical laboratory and physical findings.** Linear fits show the correlation between the concentration of platelet aggregates and each clinical parameter with a 95% confidence interval shown in gray calculated by the standard error of measured y values. P values were obtained using the two-sided ANOVA test and shown in the figure. Source data are provided as a Source Data file.

**Supplementary Data 1 | Demographics, clinical characteristics, and laboratory findings of patients with COVID-19.** All the patients in this study were hospitalized at the University of Tokyo Hospital. Data are expressed as median values (IQR), n (%), or n/N (%). p values were calculated by the *t* test, Mann-Whitney U test, one-way ANOVA, chi-squared test, or Fisher's exact test.

|                                                        | All patients<br>n = 110 | Mild patients<br>n = 23 | Moderate patients<br>n = 68 | Severe patients<br>n = 19 | p value  | Survivors<br>n = 99 | Non-survivors<br>n = 11 | p value  |
|--------------------------------------------------------|-------------------------|-------------------------|-----------------------------|---------------------------|----------|---------------------|-------------------------|----------|
| Age, years                                             | 65.0 (52.0-73.5)        | 53.0 (36.0-65.0)        | 65.5 (53.3-78.0)            | 70.0 (65.0-73.0)          | 0.0004   | 62.0 (49.0-73.0)    | 83.0(72.0-88.0)         | < 0.0001 |
| Sex                                                    |                         |                         |                             |                           | 0.077    |                     |                         | 0.75     |
| Male                                                   | 73 (66%)                | 11 (48%)                | 47 (69%)                    | 15 (79%)                  |          | 65 (66%)            | 8 (73%)                 |          |
| Female                                                 | 37 (34%)                | 12 (52%)                | 21 (31%)                    | 4 (21%)                   |          | 34 (34%)            | 3 (27%)                 |          |
| Comorbidity                                            |                         |                         |                             |                           |          |                     |                         |          |
| Hypertension                                           | 55 (50%)                | 11 (48%)                | 33 (49%)                    | 11 (58%)                  | 0.75     | 49 (49%)            | 6 (55%)                 | 0.95     |
| Diabetes                                               | 35 (32%)                | 7 (30%)                 | 19 (30%)                    | 9 (47%)                   | 0.27     | 31 (31%)            | 4 (36%)                 | 0.74     |
| Obesity, BMI > 25                                      | 38 (35%)                | 7 (30%)                 | 27 (40%)                    | 4 (21%)                   | 0.29     | 36 (36%)            | 2 (18%)                 | 0.32     |
| COPD                                                   | 4 (4%)                  | 0                       | 3 (4%)                      | 1 (6%)                    | 0.95     | 2 (2%)              | 2 (18%)                 | 0.049    |
| Coronary heart disease                                 | 6 (5%)                  | 0                       | 5 (7%)                      | 1 (6%)                    | 0.95     | 4 (4%)              | 2 (18%)                 | 0.11     |
| Chronic liver disease                                  | 9 (8%)                  | 3 (13%)                 | 4 (6%)                      | 2 (12%)                   | 0.95     | 8 (8%)              | 1 (9%)                  | 0.95     |
| Chronic kidney disease                                 | 9 (8%)                  | 3 (13%)                 | 4 (6%)                      | 2 (11%)                   | 0.95     | 7 (7%)              | 2 (18%)                 | 0.22     |
| Active malignancy                                      | 7 (6%)                  | 0                       | 6 (9%)                      | 1 (6%)                    | 0.95     | 5 (5%)              | 2 (18%)                 | 0.14     |
| Antiplatelet therapy at baseline                       | 12 (11%)                | 3 (13%)                 | 8 (12%)                     | 1 (6%)                    | 0.95     | 10 (10%)            | 2 (18%)                 | 0.34     |
| Anticoagulant therapy on the first measurement day     | 76 (69%)                | 13 (57%)                | 45 (66%)                    | 18 (95%)                  | 0.02     | 67 (68%)            | 9 (82%)                 | 0.5      |
| Laboratory findings on the first measurement day       |                         |                         |                             |                           |          |                     |                         |          |
| Leukocyte count, ×10 <sup>9</sup> /L                   | 6.4 (4.2-9.8)           | 4.0 (3.1-4.8)           | 6.9 (4.7-9.6)               | 11.1 (9.0-14.5)           | < 0.0001 | 6.1 (4.2-9.7)       | 8.4 (7.0-10.7)          | 0.13     |
| Red cell count, ×10 <sup>12</sup> /L                   | 4.25 (3.80-4.62)        | 4.34 (3.72-4.99)        | 4.29 (3.94-4.63)            | 4.11 (3.59-4.36)          | 0.084    | 4.27 (3.88-4.64)    | 4.07 (3.44-4.46)        | 0.042    |
| Platelet count, ×10 <sup>9</sup> /L                    | 236.5 (181.8-299.3)     | 227.0 (175.0-245.0)     | 248.5 (183.0-312.0)         | 212.0 (180.0-328.0)       | 0.32     | 243.0 (186.0-308.0) | 180.0 (132.0-209.0)     | 0.017    |
| ALT, U/L                                               | 27.5 (14.0-49.8)        | 13.0 (12.0-27.0)        | 31.0 (17.0-51.3)            | 34.0 (14.0-105.0)         | 0.013    | 25.0 (14.0-49.0)    | 35.0 (17.0-92.0)        | 0.23     |
| Creatinine, μmol/L                                     | 69.4 (58.1-80.7)        | 64.5 (54.8-78.7)        | 69.4 (61.0-81.8)            | 69.8 (59.2-115.8)         | 0.42     | 68.1 (57.5-79.6)    | 76.0 (69.0-155.6)       | 0.25     |
| Lactate dehydrogenase, U/L                             | 301.0 (220.8-379.5)     | 205.0 (169.0-240.0)     | 310.5 (238.3-359.0)         | 560.0 (384.0-660.0)       | < 0.0001 | 290.0 (216.0-360.0) | 564.0 (342.0-636.0)     | < 0.0001 |
| C-reactive protein, mg/L                               | 4.15 (1.54-7.87)        | 0.32 (0.09-2.52)        | 5.24 (2.20-9.44)            | 6.66 (3.72-18.81)         | < 0.0001 | 6.37 (3.02-20.56)   | 3.88 (1.25-7.50)        | 0.0077   |
| PT-INR                                                 | 1.05 (1.00-1.13)        | 0.99 (0.98-1.03)        | 1.07 (1.02-1.13)            | 1.13 (1.07-1.22)          | 0.36     | 1.05 (1.00-1.13)    | 1.06 (0.98-1.22)        | 0.46     |
| APTT, s                                                | 27.6 (25.4-30.9)        | 26.8 (25.1-29.0)        | 27.2 (25.1-30.7)            | 29.5 (27.4-36.0)          | 0.0075   | 27.2 (25.1-29.8)    | 38.4 (32.3-45.5)        | < 0.0001 |
| D-dimer, μg/mL                                         |                         |                         |                             |                           |          |                     |                         |          |
| ≤ 1                                                    | 48 (44%)                | 19 (83%)                | 28 (41%)                    | 1 (5%)                    | < 0.0001 | 47 (47%)            | 1 (9%)                  | 0.022    |
| > 1                                                    | 62 (56%)                | 4 (17%)                 | 40 (59%)                    | 18 (95%)                  |          | 52 (53%)            | 10 (91%)                |          |
| Anticoagulant therapy on the highest concentration day | 84 (76%)                | 15 (65%)                | 51 (75%)                    | 18 (95%)                  | 0.074    | 76 (77%)            | 8 (73%)                 | 0.72     |
| Laboratory findings on the highest concentration day   |                         |                         |                             |                           |          |                     |                         |          |
| Leukocyte count, ×10 <sup>9</sup> /L                   | 8.0 (4.7-10.9)          | 4.3 (3.2-5.0)           | 8.2 (5.4-10.5)              | 12.9 (9.7-15.9)           | < 0.0001 | 7.6 (4.5-10.1)      | 13.3 (8.2-20.1)         | < 0.0001 |
| Red cell count, ×10 <sup>12</sup> /L                   | 4.29 (3.72-4.68)        | 4.42 (3.72-4.99)        | 4.36 (3.98-4.68)            | 3.71 (3.06-4.38)          | 0.0027   | 4.36 (3.82-4.70)    | 3.64 (2.99-4.28)        | 0.0046   |
| Platelet count, ×10 <sup>9</sup> /L                    | 263.0 (197.8-327.3)     | 227.0 (185.0-245.0)     | 276.0 (202.0-337.0)         | 261.0 (202.0-371.0)       | 0.046    | 269.0 (200.0-332.0) | 221.0 (158.0-261.0)     | 0.019    |
| ALT, U/L                                               | 31.0 (16.0-62.0)        | 16.0 (12.0-25.0)        | 33.5 (19.3-68.8)            | 38.0 (22.0-78.0)          | 0.017    | 30.0 (15.0-62.0)    | 38.0 (28.0-92.0)        | 0.19     |
| Creatinine, μmol/L                                     | 68.5 (55.7-83.3)        | 69.0 (54.8-78.7)        | 68.1 (57.7-79.1)            | 69.8 (54.8-100.8)         | 0.32     | 67.2 (54.8-77.8)    | 100.8 (83.1-173.3)      | 0.12     |
| Lactate dehydrogenase, U/L                             | 280.0 (215.8-374.0)     | 210.0 (170.0-240.0)     | 301.0 (229.8-363.3)         | 420.0 (324.0-509.0)       | < 0.0001 | 257.0 (211.0-351.0) | 544.0 (389.0-695.0)     | < 0.0001 |
| C-reactive protein, mg/L                               | 2.52 (0.63-6.96)        | 0.39 (0.09-2.57)        | 2.72 (1.05-7.27)            | 6.01 (1.83-19.62)         | 0.0004   | 2.23 (0.51-6.60)    | 9.45 (1.11-26.31)       | < 0.0001 |
| PT-INR                                                 | 1.08 (1.01-1.13)        | 0.99 (0.98-1.06)        | 1.09 (1.03-1.15)            | 1.12 (1.05-1.16)          | 0.0059   | 1.06 (1.00-1.13)    | 1.14 (1.08-1.20)        | 0.017    |
| APTT, s                                                | 27.2 (25.2-30.1)        | 26.8 (25.1-29.0)        | 26.8 (25.0-30.1)            | 28.8 (26.2-33.4)          | 0.44     | 26.8 (25.1-29.0)    | 37.8 (30.5-53.6)        | < 0.0001 |
| D-dimer, μg/mL                                         |                         |                         |                             |                           |          |                     |                         |          |
| ≤ 1                                                    | 43 (39%)                | 19 (83%)                | 23 (34%)                    | 1 (5%)                    | < 0.0001 | 43 (43%)            | 0                       | 0.0002   |
| > 1                                                    | 67 (61%)                | 4 (17%)                 | 45 (66%)                    | 18 (95%)                  |          | 56 (57%)            | 11 (100%)               |          |



**Supplementary Data 3 | Additional laboratory findings of patients with COVID-19.** All the patients in this study were hospitalized at the University of Tokyo Hospital. p values were calculated by *t* test, Mann-Whitney U test, one-way ANOVA, chi-squared test, or Fisher's exact test.

|            | All patients                  | Mild patients                 | Moderate patients             | Severe patients               | p value  | Survivors                     | Non-survivors                 | p value  |
|------------|-------------------------------|-------------------------------|-------------------------------|-------------------------------|----------|-------------------------------|-------------------------------|----------|
| FVIII, %   | 329.2 (205.7-514.9)<br>n = 56 | 189.8 (102.8-220.1)<br>n = 11 | 342.4 (219.9-497.2)<br>n = 30 | 563.1 (404.9-612.4)<br>n = 15 | < 0.0001 | 311.0 (191.1-464.7)<br>n = 45 | 517.3 (301.1-692.7)<br>n = 11 | 0.0013   |
| TM, ng/mL  | 11.2 (8.1-18.6)<br>n = 53     | 7.7 (6.4-10.6)<br>n = 10      | 10.8 (8.8-16.2)<br>n = 29     | 24.4 (11.7-34.3)<br>n = 14    | < 0.0001 | 10.2 (8.0-12.7)<br>n = 42     | 26.4 (20.9-32.9)<br>n = 11    | < 0.0001 |
| VWF:Rco, % | 380.9 (224.1-494.5)<br>n = 55 | 232.1 (120.2-292.9)<br>n = 11 | 380.9 (224.1-483.5)<br>n = 31 | 501.4 (427.9-751.2)<br>n = 13 | 0.0001   | 333.5 (218.0-463.7)<br>n = 45 | 660.6 (476.3-843.4)<br>n = 10 | < 0.0001 |
| FDP, µg/mL | 3.4 (2.5-10.9)<br>n = 83      | 2.5 (2.5-3.5)<br>n = 16       | 3.4 (2.5-9.2)<br>n = 52       | 12.3 (5.9-18.6)<br>n = 15     | 0.50     | 3.4 (2.5-8.3)<br>n = 72       | 13.2 (7.1-22.9)<br>n = 11     | 0.28     |
| TAT, ng/mL | 6.0 (3.5-10.2)<br>n = 80      | 3.1 (1.5-7.9)<br>n = 16       | 6.3 (4.3-10.4)<br>n = 50      | 8.6 (5.3-14.8)<br>n = 14      | 0.35     | 5.5 (3.1-8.9)<br>n = 69       | 17.5 (10.8-22.1)<br>n = 11    | 0.0031   |
| FMC, µg/mL | 3.0 (3.0-5.4)<br>n = 55       | 3.0 (3.0-3.2)<br>n = 11       | 3.0 (3.0-4.0)<br>n = 31       | 4.8 (3.0-10.2)<br>n = 13      | 0.70     | 3.0 (3.0-3.8)<br>n = 45       | 6.1 (3.0-16.5)<br>n = 10      | 0.20     |
| PIC, µg/mL | 1.9 (1.1-3.0)<br>n = 80       | 1.0 (0.8-2.0)<br>n = 16       | 1.9 (1.3-3.2)<br>n = 50       | 2.2 (1.7-3.0)<br>n = 14       | 0.16     | 1.9 (1.1-3.1)<br>n = 69       | 1.6 (1.3-2.3)<br>n = 11       | 0.25     |
| Fbg, g/L   | 5.17 (4.03-6.20)<br>n = 106   | 4.12 (3.55-5.55)<br>n = 22    | 5.32 (4.19-6.33)<br>n = 65    | 5.90 (4.59-6.69)<br>n = 19    | 0.085    | 5.18 (4.17-6.20)<br>n = 95    | 4.74 (2.95-5.63)<br>n = 11    | 0.085    |
| AT, %      | 100.0 (90.9-107.1)<br>n = 59  | 100.4 (92.8-117.3)<br>n = 11  | 103.5 (88.3-107.5)<br>n = 33  | 93.9 (90.9-98.6)<br>n = 15    | 0.19     | 101.6 (92.6-108.3)<br>n = 48  | 77.8 (67.7-98.6)<br>n = 11    | < 0.0001 |
| CK, U/L    | 47.0 (28.0-97.0)<br>n = 87    | 56.5 (35.5-87.8)<br>n = 16    | 50.0 (28.5-104.0)<br>n = 53   | 38.0 (24.0-97.8)<br>n = 18    | 0.72     | 47.0 (28.0-98.0)<br>n = 77    | 46.5 (32.0-112.5)<br>n = 10   | 0.0044   |



**Supplementary Data 4 | Multivariate regression analysis.** The upper part shows the first analysis while the lower part shows the second analysis, to determine explanatory factors for predicting the concentration of platelet aggregates on the highest concentration day.

| Objective factor                      |                      | Concentration of platelet aggregates on the highest concentration day |         |
|---------------------------------------|----------------------|-----------------------------------------------------------------------|---------|
| Explanatory factor                    |                      | Standardized coefficient ( $\beta$ )                                  | p value |
| Vascular endothelial disorder markers | FVIII                | 0.568                                                                 | < 0.001 |
|                                       | TM                   |                                                                       | NS      |
|                                       | VWF:Rco              |                                                                       | NS      |
|                                       | R <sup>2</sup>       | 0.322 (p < 0.001)                                                     |         |
| Coagulation / fibrinolysis markers    | PT-INR               | 0.222                                                                 | 0.049   |
|                                       | D-dimer              |                                                                       | NS      |
|                                       | FDP                  |                                                                       | NS      |
|                                       | TAT                  |                                                                       | NS      |
|                                       | R <sup>2</sup>       | 0.049 (p = 0.049)                                                     |         |
| Other markers                         | WBC                  | 0.265                                                                 | 0.009   |
|                                       | Respiratory severity | 0.306                                                                 | 0.002   |
|                                       | PLT                  | 0.227                                                                 | 0.006   |
|                                       | LD                   |                                                                       | NS      |
|                                       | ALT                  |                                                                       | NS      |
|                                       | SpO <sub>2</sub>     |                                                                       | NS      |
|                                       | Survival             |                                                                       | NS      |
|                                       | Gender               |                                                                       | NS      |
|                                       | R <sup>2</sup>       | 0.364 (p < 0.001)                                                     |         |

| Objective factor   |                      | Concentration of platelet aggregates on the highest concentration day |         |
|--------------------|----------------------|-----------------------------------------------------------------------|---------|
| Explanatory factor |                      | Standardized coefficient ( $\beta$ )                                  | p value |
| Selected markers   | Respiratory severity | 0.355                                                                 | 0.009   |
|                    | FVIII                | 0.323                                                                 | 0.016   |
|                    | WBC                  |                                                                       | NS      |
|                    | PLT                  |                                                                       | NS      |
|                    | PT-INR               |                                                                       | NS      |
|                    | R <sup>2</sup>       | 0.352 (p < 0.001)                                                     |         |

**Supplementary Data 5 | Demographics, clinical characteristics, and laboratory findings of patients with other diseases.** All the patients in this study were hospitalized at the University of Tokyo Hospital. Data are expressed as median values (IQR) or n/N (%).

|                                      | Positive control    |
|--------------------------------------|---------------------|
|                                      | n = 7               |
| Age, years                           | 47.0 (17.0-70.0)    |
| Sex                                  |                     |
| Male                                 | 3 (43%)             |
| Female                               | 4 (57%)             |
| Comorbidity                          |                     |
| Hypertension                         | 2 (29%)             |
| Diabetes                             | 1 (14%)             |
| Obesity, BMI > 25                    | 1 (14%)             |
| Coronary heart disease               | 0                   |
| Active malignancy                    | 0                   |
| Antiplatelet therapy                 | 0                   |
| Anticoagulant therapy                | 0                   |
| Laboratory findings                  |                     |
| Leukocyte count, ×10 <sup>9</sup> /L | 5.1 (4.7-5.2)       |
| Platelet count, ×10 <sup>9</sup> /L  | 238.0 (218.5-283.0) |
| ALT, U/L                             | 19.0 (15.5-29.0)    |
| Creatinine, μmol/L                   | 64.5 (59.7-74.7)    |
| Lactate dehydrogenase, U/L           | 216.0 (196.0-223.0) |
| C-reactive protein, mg/L             | 0.02 (0.02-0.05)    |
| D-dimer, μg/mL                       | 0.5 (0.5-0.7)       |
